# Supplementary material for: Tandem catalytic conversion of 1-butene and ethene to propene over combined mesoporous W-FDU-12 and MgO catalysts
Source: Royal Society of Chemistry journal article supplement (doi:10.1039/c5ra02066b), 2015-01-01
Supplement: c5ra02066b1.pdf [file c5ra02066b1.pdf]

## Supporting Information

### **Tandem Catalytic Conversion of 1-Butene and Ethene to Propene over Combined Mesoporous W-FDU-12 and MgO Catalysts**

Wei Xu<sup>a,b</sup>, Chao Lin<sup>a</sup>, Huan Liu<sup>a</sup>, Hongbo Yu<sup>a</sup>, Kai Tao<sup>a\*</sup>, Shenghu Zhou<sup>a\*</sup>

<sup>a</sup>Ningbo Institute of Materials Technology and Engineering, Chinese Academy of  
Sciences, Ningbo, Zhejiang 315201, P. R. China

<sup>b</sup>Center of Applied Solid State Chemistry Research, Ningbo University, P. R. China

#### **\*Corresponding author**

Tel.: (+86) 574 86696927

Fax: (+86) 574 86685043

E-mail: [zhoush@nimte.ac.cn](mailto:zhoush@nimte.ac.cn), [taokai@nimte.ac.cn](mailto:taokai@nimte.ac.cn)

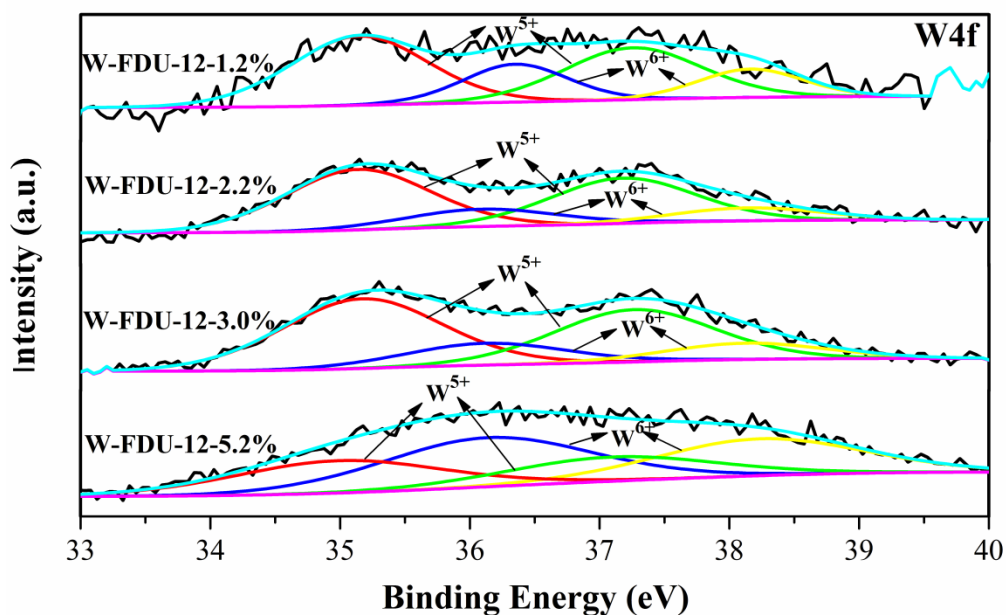

Figure S1 XPS spectra of W-FDU-12 catalysts with various W contents.

**Table S1. Binding energies and molar percentages of  $W^{6+}$  and  $W^{5+}$  species in different catalysts.**

| Catalysts    | Binding energies of $W_{4f}$ (eV) |                  |                  |                  | $W^{5+}$ (%) | $W^{6+}$ (%) |
|--------------|-----------------------------------|------------------|------------------|------------------|--------------|--------------|
|              | $W^{6+}4f_{5/2}$                  | $W^{6+}4f_{7/2}$ | $W^{5+}4f_{5/2}$ | $W^{5+}4f_{7/2}$ |              |              |
| W-FDU-12-1.2 | 38.3                              | 36.2             | 37.2             | 35.1             | 70.5         | 29.5         |
| W-FDU-12-2.2 | 38.2                              | 36.2             | 37.3             | 35.1             | 77.0         | 23.0         |
| W-FDU-12-3.0 | 38.3                              | 36.2             | 37.2             | 35.0             | 75.9         | 24.1         |
| W-FDU-12-5.2 | 38.4                              | 36.3             | 37.2             | 35.1             | 40.3         | 59.7         |

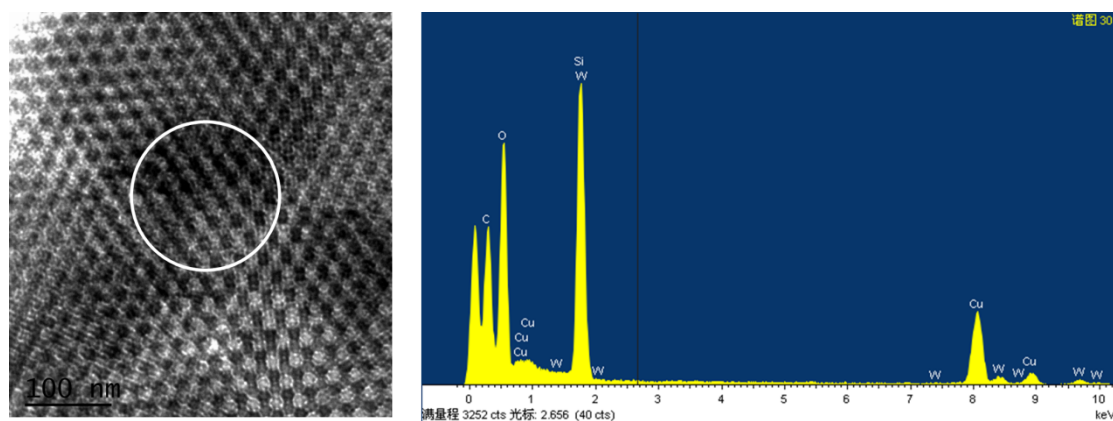

Figure S2 TEM image of W-FDU-12-4.0% (left panel) and corresponding EDX spectra (right panel).

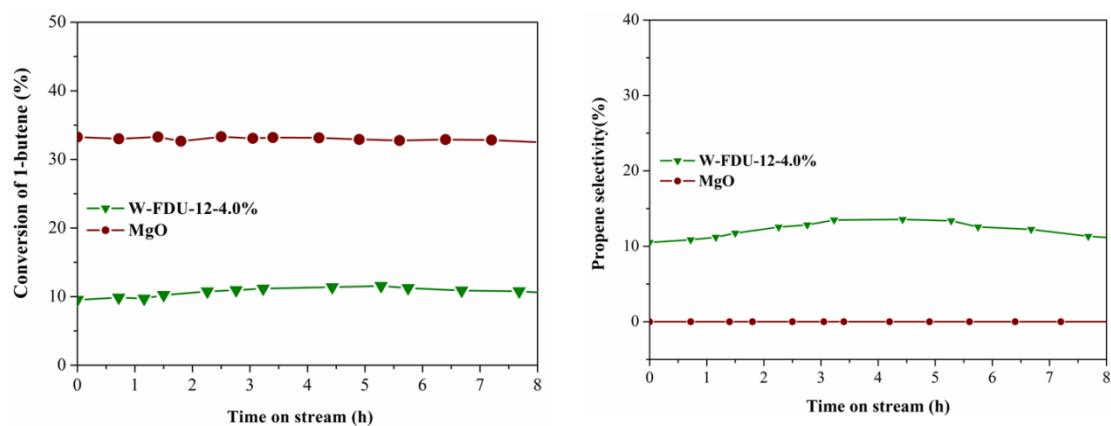

Figure S3 1-butene conversion and propene selectivity over individual MgO or W-FDU-12-4.0% catalyst. Reaction conditions:  $T=450^{\circ}\text{C}$ ;  $P=0.1\text{MPa}$ ;  $1\text{-C}_4\text{H}_8/\text{C}_2\text{H}_4=1/2$ ; WHSV ( $1\text{-C}_4\text{H}_8+\text{C}_2\text{H}_4$ ) of  $0.9\text{ h}^{-1}$ .

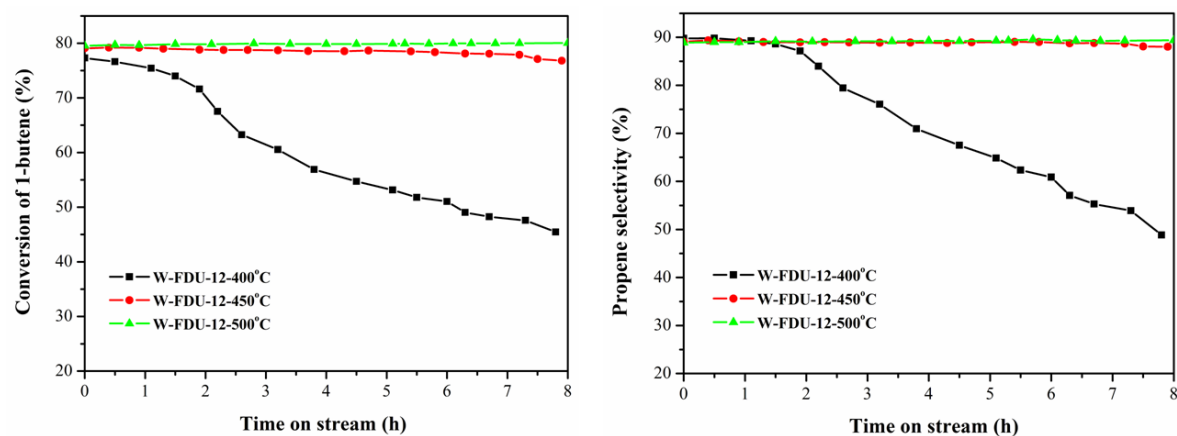

Figure S4. 1-Butene conversion (left panel) and propene selectivity (right panel) over W-FDU-12-4.0% catalysts at different reaction temperatures. Reaction conditions:  $P=0.1\text{MPa}$ ;  $1\text{-C}_4\text{H}_8/\text{C}_2\text{H}_4=1/2$ ; WHSV ( $1\text{-C}_4\text{H}_8+\text{C}_2\text{H}_4$ ) of  $0.9\text{ h}^{-1}$ ; W-contained catalyst=1.0 g.

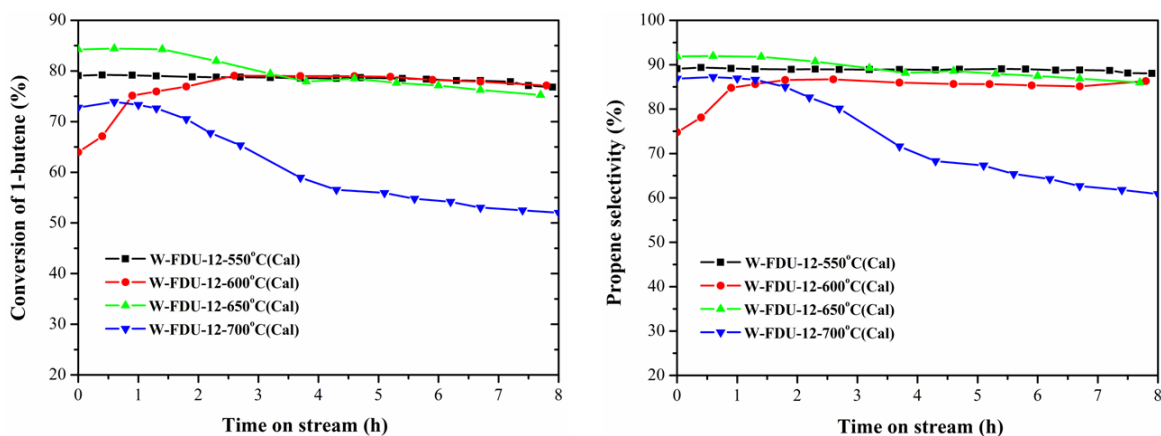

**Figure S5.** 1-Butene conversion (left panel) and propene selectivity (right panel) over W-FDU-12-4.0% catalysts at different calcinated temperatures. Reaction conditions: T=450 °C; P=0.1MPa; 1-C<sub>4</sub>H<sub>8</sub>/C<sub>2</sub>H<sub>4</sub>=1/2; WHSV (1-C<sub>4</sub>H<sub>8</sub>+C<sub>2</sub>H<sub>4</sub>) of 0.9 h<sup>-1</sup>; W-contained catalyst=1.0 g.

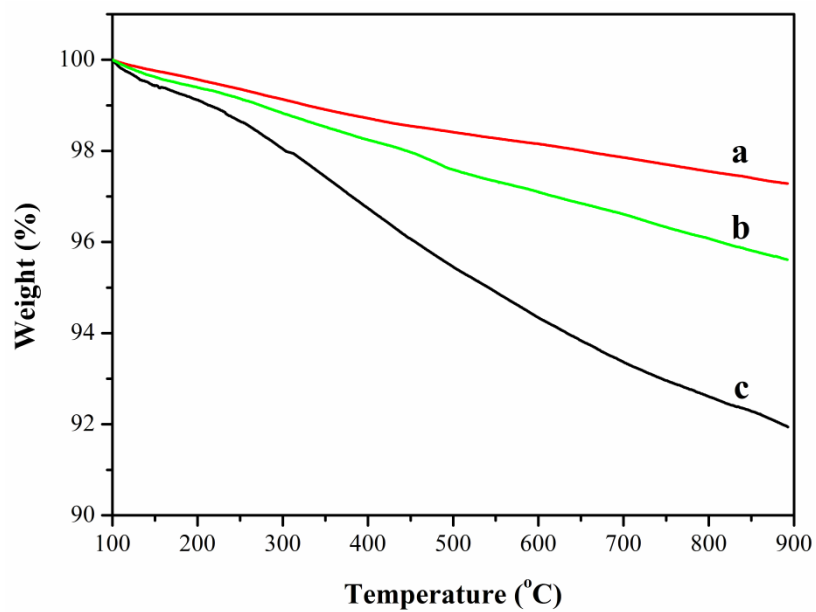

**Figure S6.** The TG curves of different used catalysts after 8 hours of reaction showing (a) W-FDU-12-4.0%; (b) WO<sub>3</sub>/FDU-12-4.0%; and (c) WO<sub>3</sub>/SiO<sub>2</sub>-4.0%.
